# Supplementary material for: What Is the Role of Therapeutic Plasma Exchange as an Adjunctive Treatment in Severe COVID-19: A Systematic Review
Source: MDPI journal article supplement (doi:10.3390/v13081484), 2021-07-28
Supplement: s1 [file s1]

Table S1. Detailed summary of the included studies.

|                    | Study Type  | Population                                                                                                                                                                                                | Concomitant immunomodulatory therapies                                                                           | Intervention                                                                                | Median time from first symptoms to TPE initiation | Replacement fluid                                   | Adverse effects of TPE | Outcome                                                                                                                                                                                                                                                                                                                                                                                                                                                                |
|--------------------|-------------|-----------------------------------------------------------------------------------------------------------------------------------------------------------------------------------------------------------|------------------------------------------------------------------------------------------------------------------|---------------------------------------------------------------------------------------------|---------------------------------------------------|-----------------------------------------------------|------------------------|------------------------------------------------------------------------------------------------------------------------------------------------------------------------------------------------------------------------------------------------------------------------------------------------------------------------------------------------------------------------------------------------------------------------------------------------------------------------|
| Zhang et al. [21]  | Case series | 3 severely ill patients (median 55 year, all male) with COVID-19 related ARDS unresponsive to initial antiviral treatment and other therapeutic interventions.                                            | Arbidol<br>Interferon alpha-2b                                                                                   | 1 TPE session (3L of plasma exchanged each session) 1-3 days after admission to ICU         | 15 days                                           | FFP                                                 | N/A                    | <p><b>Mortality (day 14) – 0%</b></p> <p><b>Values before and after TPE:</b></p> <p><b>PaO<sub>2</sub>/FiO<sub>2</sub> – 168 =&gt; 300 *</b></p> <p><b>CRP – 123.1 =&gt; 19.4 mg/L *</b></p> <p><b>Lymphocytes – 0.56 =&gt; 1.53 10<sup>9</sup>/L</b></p> <p><b>IL-6 – 18.28 =&gt; 4.53 pg/mL</b></p> <p><b>LDH – 823 =&gt; 303 U/L</b></p>                                                                                                                            |
| Morath et al. [22] | Case series | 5 patients (median 67 years, 60% male) with COVID-19 induced multi-organ failure and ARDS. All patients underwent IMV.                                                                                    | Hydroxychloroquine<br>Maraviroc<br>Aciclovir<br>Ganciclovir<br>Tocilizumab<br>Prednisolone<br>Convalescent serum | All patients received 1-2 TPE sessions (with median 3.39 L of plasma replaced each session) | 12 days                                           | FFP                                                 | N/A                    | <p><b>Mortality – 20%</b></p> <p><b>Values 2 hrs before and 24 hrs after the last TPE:</b></p> <p><b>CRP – 126 =&gt; 50 mg/L*</b></p> <p><b>IL-6 – 410 =&gt; 102 pg/mL*</b></p> <p><b>LDH – 651 =&gt; 440 U/L *</b></p> <p><b>D-Dimer – 15 =&gt; 4 mg/L*</b></p> <p><b>Ferritin – 1444 =&gt; 700 ug/L*</b></p>                                                                                                                                                         |
| Faqihi et al. [23] | Case series | 10 patients (median 51 years, 70% males) with either ARDS, APACHE II score >20, septic shock or cytokine release syndrome. On admission, the median SOFA score was 11 points. All patients underwent IMV. | Hydrocortisone<br>Hydroxychloroquine                                                                             | All patients received 5-7 TPE (dosed as 1-1.5 plasma volumes each session)                  | 6.5 days                                          | 5% albumin or FFP if patient presented coagulopathy | None                   | <p><b>Mortality (day 28) – 10%</b></p> <p><b>Values 24 hrs before and 24 hrs after the last TPE:</b></p> <p><b>PaO<sub>2</sub>/FiO<sub>2</sub> – 110 =&gt; 340 mmHg *</b></p> <p><b>CRP – 71.3 =&gt; 13.2 mg/L*</b></p> <p><b>Lymphocytes – 0.6 =&gt; 1.15 10<sup>9</sup>/L*</b></p> <p><b>IL-6 – 159.5 =&gt; 31.2 pg/mL*</b></p> <p><b>LDH – 576.5 =&gt; 199.5 U/L*</b></p> <p><b>D-Dimer – 7.4 =&gt; 0.9 mg/L*</b></p> <p><b>Ferritin – 1233 =&gt; 290 ug/L*</b></p> |

|                     |              |                                                                                                                                                                                                                                                                                   |                                                                                                                                           |                                                                                               |        |                                               |                                                                     |                                                                                                                                                                                                                                                                                                                                                                                                                       |
|---------------------|--------------|-----------------------------------------------------------------------------------------------------------------------------------------------------------------------------------------------------------------------------------------------------------------------------------|-------------------------------------------------------------------------------------------------------------------------------------------|-----------------------------------------------------------------------------------------------|--------|-----------------------------------------------|---------------------------------------------------------------------|-----------------------------------------------------------------------------------------------------------------------------------------------------------------------------------------------------------------------------------------------------------------------------------------------------------------------------------------------------------------------------------------------------------------------|
| Gucyem et al. [17]  | Case-control | 73 patients (aged ~ 62 years, 70% male) with COVID-19 related pneumonia. On admission, the median SOFA score was 6 points. 80% of patients underwent IMV.                                                                                                                         | Cytokine Filters in 7 patients<br>IL-6 blocker in 21 patients<br>Steroids in 41 patients                                                  | 18 patients received 3 TPE sessions                                                           | N/A    | N/A                                           | N/A                                                                 | <b>Mortality (non-TPE vs TPE) – 58.3% vs 8.3%*</b><br><br><b>Values before and after TPE:</b><br><br><b>CRP – 118 =&gt; 9 mg/L</b><br><b>Lymphocytes – 0.9 =&gt; 1.02 10<sup>9</sup>/L</b><br><b>IL-6 – 161 =&gt; 24.5 pg/mL</b><br><b>LDH – 436 =&gt; 239 U/L</b><br><b>D-Dimer – 7.8 =&gt; 1.3 mg/L</b><br><b>Ferritin – 1268 =&gt; 405 ug/L</b>                                                                    |
| Khamis et al. [24]  | Case-control | 31 critically ill patients (mean age of 51 years, 90% male) with COVID-19 related ARDS, severe pneumonia, septic shock or multiple organ dysfunction syndrome. The median SOFA score on admission was 5 points. Out of 11 patients, who received TPE, only one was not intubated. | Tocilizumab in 12 patients                                                                                                                | 11 patients underwent 5 TPE sessions                                                          | N/A    | FFP                                           | One hypotension episode treated with fluid bolus and hydrocortisone | <b>Mortality (non-TPE vs TPE, day 28) – 35% vs 0%*</b><br><br><b>Values at day 0 and day 7:</b><br><br><b>SOFA score – 6 =&gt; 4</b><br><b>PaO<sub>2</sub>/FiO<sub>2</sub> – 130.5 =&gt; 216.5 mmHg</b><br><b>CRP – 187 =&gt; 33 mg/L</b><br><b>Lymphocytes – 0.81 =&gt; 1.5 10<sup>9</sup>/L</b><br><b>IL-6 – 180.5 =&gt; 57 pg/Ml</b><br><b>D-Dimer – 3.4 =&gt; 2 mg/L</b><br><b>Ferritin – 1125 =&gt; 429 ug/L</b> |
| Jaiswal et al. [25] | Case-control | 14 patients (of median age 51.5 years, male 78.6%) with severe COVID-19 infection according to WHO classification (ARDS, sepsis or septic shock). All patients underwent IMV.                                                                                                     | Methylprednisolone in all patients<br>Hydroxychloroquine in 5 patients<br>Favapiravir in 6 patients<br>Lopinavir/ritonavir in 10 patients | All patients received 1 TPE session (30-40ml/kg body weight of plasma exchanged each session) | 9 days | Convalescent Plasma                           | 3 cases of hypotension treated with fluid bolus                     | <b>Mortality (day 28) – 28.6%</b><br><br><b>Values at day 0 and day 7:</b><br><br><b>PaO<sub>2</sub>/FiO<sub>2</sub> – 138.9 =&gt; 224.8 mmHg</b><br><b>CRP – 86.7 =&gt; 30.6 mg/L*</b><br><b>Lymphocytes – 0.7 =&gt; 1.04 10<sup>9</sup>/L</b><br><b>D-Dimer – 4.20 =&gt; 4.21 mg/L</b><br><b>Ferritin – 1416.3 =&gt; 1051.4 ug/L</b>                                                                                |
| Gluck et al. [26]   | Case-series  | 10 patients (mean age of 51.8 years, male 30%) with COVID-19 and Penn class 3 and 4 cytokine release syndrome.                                                                                                                                                                    | Hydroxychloroquine in 2 patients                                                                                                          | All patients received 5 TPE sessions                                                          | N/A    | 5% albumin or FFP if coagulopathy was present | None                                                                | <b>Mortality (day 14) – 0%</b><br><br><b>Values at day 0 and day 14:</b>                                                                                                                                                                                                                                                                                                                                              |

|                       |                                |                                                                                                                                                                                                                                                                                                                                                                               |                                                                                                                       |                                                                                                             |         |                                    |                                                                                                                |                                                                                                                                                                                                                                                                                                                           |
|-----------------------|--------------------------------|-------------------------------------------------------------------------------------------------------------------------------------------------------------------------------------------------------------------------------------------------------------------------------------------------------------------------------------------------------------------------------|-----------------------------------------------------------------------------------------------------------------------|-------------------------------------------------------------------------------------------------------------|---------|------------------------------------|----------------------------------------------------------------------------------------------------------------|---------------------------------------------------------------------------------------------------------------------------------------------------------------------------------------------------------------------------------------------------------------------------------------------------------------------------|
|                       |                                | 60% of patients underwent IMV.                                                                                                                                                                                                                                                                                                                                                |                                                                                                                       |                                                                                                             |         |                                    |                                                                                                                | <b>PaO<sub>2</sub>/FiO<sub>2</sub></b> - 115 => 151 mmHg<br><b>CRP</b> - 149.9 => 24.8 mg/L*<br><b>IL-6</b> - 32.04 => 5.92 pg/mL*                                                                                                                                                                                        |
| Karman et al. [27]    | Propensity score matched study | 90 patients (median age 70 years, male 92%) with severe COVID-19 infection and cytokine release syndrome (patients with septic shock at the time of admission and patients who died within 48 hours since admission were excluded from the analysis). 59.2% of patients were defined as critical (SOFA >10 points or evidence of septic shock). 16% of patients received IMV. | Methylprednisolone in all patients                                                                                    | 45 patients received one TPE until resolution of the disease (1.5x of plasma volume exchanged each session) | N/A     | FFP and normal saline in 2:1 ratio | 1 femoral artery puncture and thrombophlebitis treated accordingly                                             | <b>Mortality (non-TPE vs TPE, day 28)</b> - 38.5% vs 8.9%*<br><br><b>Values at day 0:</b><br><b>CRP</b> - 145 => N/A mg/L<br><b>Lymphocytes</b> - 0.7 => N/A 10 <sup>9</sup> /L<br><b>IL-6</b> - 78 => N/A pg/mL<br><b>LDH</b> - 549 => N/A U/L<br><b>D-Dimer</b> - 3.5 => N/A mg/L<br><b>Ferritin</b> - 1500 => N/A ug/L |
| Fernandez et al. [28] | Case-series                    | 4 critically ill patients (median age of 56 years, male 100%) with COVID-19. 75% of patients underwent IMV.                                                                                                                                                                                                                                                                   | Lopinavir/ritonavir<br>Hydroxychloroquine<br>Interferon beta-1a<br>Tocilizumab<br>Dexamethasone<br>Methylprednisolone | 2-6 plasma exchange sessions (1.2x plasma volume exchanged each session)                                    | 20 days | 5% albumin + FFP                   | 1 episode of hypotension and tachycardia requiring increase in norepinephrine doses following the FFP infusion | <b>Mortality (day 28)</b> - 0%<br><br><b>Values at day 0 and day 14:</b><br><b>CRP</b> - 51.5 => 5.4 mg/L<br><b>Lymphocytes</b> - 1.25 => 0.95 10 <sup>9</sup> /L<br><b>IL-6</b> - 17.5 => 12.5 pg/mL<br><b>LDH</b> - 551 => 245.5 U/L<br><b>D-Dimer</b> - 11.76 => 3.65 mg/L<br><b>Ferritin</b> - 2058 => 494 ug/L       |
| Dogan et al. [29]     | Case-series                    | 6 patients (median age of 53 years, male 83%) with COVID-19-related autoimmune meningoencephalitis. All patients underwent IMV.                                                                                                                                                                                                                                               | Lopinavir/ritonavir<br>Hydroxychloroquine                                                                             | 1-9 plasma exchange sessions                                                                                | N/A     | 5% albumin                         | N/A                                                                                                            | <b>Mortality (day 14)</b> - 16.7%<br><br><b>Values at day 0:</b><br><b>CRP</b> - 138.6 => N/A mg/L<br><b>IL-6</b> - 510 => N/A pg/mL                                                                                                                                                                                      |

|                      |                             |                                                                                                                                                                                                                                                                                                                                                                      |                                                                         |                                                                                                                                                             |         |                                                              |      |                                                                                                                                                                                                                                                                                                                                                                                                                                            |
|----------------------|-----------------------------|----------------------------------------------------------------------------------------------------------------------------------------------------------------------------------------------------------------------------------------------------------------------------------------------------------------------------------------------------------------------|-------------------------------------------------------------------------|-------------------------------------------------------------------------------------------------------------------------------------------------------------|---------|--------------------------------------------------------------|------|--------------------------------------------------------------------------------------------------------------------------------------------------------------------------------------------------------------------------------------------------------------------------------------------------------------------------------------------------------------------------------------------------------------------------------------------|
|                      |                             |                                                                                                                                                                                                                                                                                                                                                                      |                                                                         |                                                                                                                                                             |         |                                                              |      | <b>LDH</b> – 359 => N/A U/L<br><b>D-Dimer</b> – 6.4 => N/A mg/L<br><b>Ferritin</b> – 1332 => N/A ug/L                                                                                                                                                                                                                                                                                                                                      |
| Adeli et al. [30]    | Case series                 | 8 patients (male 87.5%) of median age of 52 years. 37.5% of patients received IMV.                                                                                                                                                                                                                                                                                   | Dexamethasone, Hydroxychloroquine, Lopinavir/ritonavir, Interferon beta | 3-5 plasma exchange sessions (2L of plasma exchanged each session)                                                                                          | N/A     | A combination of FFP, Albumin solution and calcium gluconate | None | <b>Mortality (no specified day)</b> – 12.5%                                                                                                                                                                                                                                                                                                                                                                                                |
| De Prost et al. [31] | Case series                 | 4 critically-ill patients (median age 52 years; 75% male) with high blood concentrations of neutralizing autoantibodies against type I interferons. Median duration of symptoms was 5.5 days. Median admission SOFA score was 7 points. 75% of patients underwent IMV.                                                                                               | Dexamethasone                                                           | 3-4 plasma exchange sessions                                                                                                                                | 18 days | 5% albumin solution                                          | None | <b>Mortality (no specified day)</b> – 50%<br><br><b>Values at day 0:</b><br><b>PaO<sub>2</sub>/FiO<sub>2</sub></b> - 70 => N/A mmHg<br><b>Lymphocytes</b> – 1.1 => N/A<br><b>D-Dimer</b> – 3.8 => N/A mg/L                                                                                                                                                                                                                                 |
| Faqihi et al. [32]   | Randomized controlled trial | 87 intubated patients with either ARDS, APACHE II score >20, septic shock or cytokine release syndrome. The median age was 49 years. 82 % of all patients were male. The median SOFA score on admission was 10. Despite randomization, intervention group (43 patients) presented significantly higher frequency of pulmonary embolism and higher risk of developing | Dexamethasone, Ribavirin                                                | 43 patients received 1-5 (median 3) plasma exchange sessions (with doses of 1.5x plasma volumes on the first day and 1x plasma volume during the next days) | 8 days  | FFP                                                          | None | <b>Intervention group vs Control group:</b><br><br><b>Mortality (on day 35)</b> – 20.9% vs 34.1 % (p=0.09)<br><br><b>ICU LOS</b> – 19 days vs 26 days *<br><br><b>MV duration</b> – 15 days vs 19 days *<br><br><b>SOFA score</b> – 10 => 2 points vs 9 => 4.5 points *<br><br><b>Values at day 0 and within 24 hrs after finishing the last TPE:</b><br><br><b>PaO<sub>2</sub>/FiO<sub>2</sub></b> - 135 => 300 mmHg vs 125 => 255 mmHg * |

|                     |             |                                                                                                                                                                                                                                                                                                                                           |                                                                         |                                                                          |     |                                                         |     |                                                                                                                                                                                                                                                                                                   |                                                                                        |
|---------------------|-------------|-------------------------------------------------------------------------------------------------------------------------------------------------------------------------------------------------------------------------------------------------------------------------------------------------------------------------------------------|-------------------------------------------------------------------------|--------------------------------------------------------------------------|-----|---------------------------------------------------------|-----|---------------------------------------------------------------------------------------------------------------------------------------------------------------------------------------------------------------------------------------------------------------------------------------------------|----------------------------------------------------------------------------------------|
|                     |             | cytokine release syndrome                                                                                                                                                                                                                                                                                                                 |                                                                         |                                                                          |     |                                                         |     |                                                                                                                                                                                                                                                                                                   | <b>CRP</b> – 246 => 45 mg/L vs 234 => 78 mg/L *                                        |
|                     |             |                                                                                                                                                                                                                                                                                                                                           |                                                                         |                                                                          |     |                                                         |     |                                                                                                                                                                                                                                                                                                   | <b>Lymphocytes</b> – 0.5 => 1.0 10 <sup>9</sup> /L vs 0.6 -=> 0.7 10 <sup>9</sup> /L * |
|                     |             |                                                                                                                                                                                                                                                                                                                                           |                                                                         |                                                                          |     |                                                         |     |                                                                                                                                                                                                                                                                                                   | <b>IL-6</b> – 458 => 35 pg/mL vs 122 => 27 pg/mL *                                     |
|                     |             |                                                                                                                                                                                                                                                                                                                                           |                                                                         |                                                                          |     |                                                         |     |                                                                                                                                                                                                                                                                                                   | <b>LDH</b> – 876 => 236 U/L vs 378 => 343 U/L *                                        |
|                     |             |                                                                                                                                                                                                                                                                                                                                           |                                                                         |                                                                          |     |                                                         |     |                                                                                                                                                                                                                                                                                                   | <b>D-Dimers</b> – 4.9 => 0.9 mg/L vs 2.5 => 0.95 mg/L *                                |
|                     |             |                                                                                                                                                                                                                                                                                                                                           |                                                                         |                                                                          |     |                                                         |     |                                                                                                                                                                                                                                                                                                   | <b>Ferritin</b> – 987 => 299 ng/mL vs 320 => 287 ng/mL *                               |
|                     |             |                                                                                                                                                                                                                                                                                                                                           |                                                                         |                                                                          |     |                                                         |     |                                                                                                                                                                                                                                                                                                   | <b>ADAMTS-13 activity</b> – 17 => 42% vs 37 => 32% *                                   |
| Hashemi et al. [33] | Case-series | 15 patients of mean age 57.6 years. (60% males)<br>At baseline the mean SOFA score was 9.6.<br>27% of patients (with PaO <sub>2</sub> /FiO <sub>2</sub> lower than 100 mmHg) required IMV whilst NIPPV was used for the other subjects (73%).<br>During the study, two patients on NIPPV developed severe hypoxemia requiring intubation. | Favipiravir, Remdesivir                                                 | 1-3 TPE sessions (40 ml/kg body weight of plasma exchanged each session) | N/A | 5% albumin solution + 0.9% saline / convalescent plasma | N/A | <b>Mortality (no specified day)</b> – 40%<br><br><b>Values before and after the last TPE:</b><br><br><b>PaO<sub>2</sub>/FiO<sub>2</sub></b> 184.3 => 224.0 mmHg *<br><br><b>CRP</b> – 47.3 => 28.5 mg/L *<br><br><b>IL-6</b> – 8.3 => 5.7 pg/mL *<br><br><b>Ferritin</b> – 1027.3 => 654.0 ng/mL* |                                                                                        |
| Keith et al. [34]   | Case series | 8 patients (median age of 67.5 years; 75% male) with mean admission SOFA 6.8 points. 7 patients received IMV and 1 NIPPV.                                                                                                                                                                                                                 | Methylprednisolone, Hydroxychloroquine, azithromycin, zinc, tocilizumab | 1-7 plasma exchange sessions ( 1x plasma volume during each session)     | N/A | FFP                                                     | N/A | <b>Mortality (no specified day)</b> – 25%<br><br><b>Values before and after the earliest TPE:</b><br><br><b>SOFA score</b> – 9.3 => 6.4 points *<br><br><b>CRP</b> – 266.1 => 176.5 mg/dL *                                                                                                       |                                                                                        |

|                        |             |                                                                                                                                                                                                    |                                                                                                                                             |                                                                                                                      |         |                                                                                                                                          |      |                                                                                                                                                                                                                                             |
|------------------------|-------------|----------------------------------------------------------------------------------------------------------------------------------------------------------------------------------------------------|---------------------------------------------------------------------------------------------------------------------------------------------|----------------------------------------------------------------------------------------------------------------------|---------|------------------------------------------------------------------------------------------------------------------------------------------|------|---------------------------------------------------------------------------------------------------------------------------------------------------------------------------------------------------------------------------------------------|
|                        |             |                                                                                                                                                                                                    |                                                                                                                                             |                                                                                                                      |         |                                                                                                                                          |      | <b>D-Dimers – 6.2 =&gt; 3.2 mg/L</b>                                                                                                                                                                                                        |
|                        |             |                                                                                                                                                                                                    |                                                                                                                                             |                                                                                                                      |         |                                                                                                                                          |      | <b>Ferritin – 1404.9 =&gt; 984.4 ng/mL *</b>                                                                                                                                                                                                |
| Matsushita et al. [35] | Case-series | 5 patients (median age 76 years; 80% males,) with PaO <sub>2</sub> /FiO <sub>2</sub> ratio of less than 200 and/or labored respiration and/or tracheal intubation (60% of patients underwent IMV). | Different combinations of methylprednisolone / remdesivir/ Favipiravir/ Cyclosonid /Gamma-globulin/ Nafamostat mesylate/ Hydroxychloroquine | 3-7 plasma exchange sessions                                                                                         | 14 days | FFP                                                                                                                                      | N/A  | <b>Mortality (no specified day) – 60%</b>                                                                                                                                                                                                   |
| Roshandel et al. [36]  | Case series | 5 COVID-19 patients (median age 62 years; 40% male) with respiratory failure (respiratory rate >30/min, need for MV, oxygen saturation <90%). 20% of all patients underwent IMV.                   | Lopinavir/ritonavir, hydroxychloroquine, azithromycin and steroids                                                                          | 2 standard plasma exchange sessions (1.5-2.0 L exchanged each session) and 1 subsequent TPE with convalescent plasma | 39 days | FFP + 0.9 % saline solution containing 5 % human albumin during the first 2 procedures, then convalescent plasma was used instead of FFP | N/A  | <b>Mortality (no specified day) – 20%</b><br><br><b>Values before and after 7 days after TPE + CPT:</b><br><br>CRP – 20 => 5 mg/L<br><br>IL-6 – 55.16 => 3.66 pg/mL<br><br>LDH – 1124 => 576 U/L<br><br><b>D-Dimer – 3.8 =&gt; 1.6 mg/L</b> |
| Truong et al. [37]     | Case series | 6 critically ill patients (of median age 54 years; 100% male) with plasma hyperviscosity. Mean SOFA score on admission was 12.3 points. 100% of patients underwent IMV.                            | N/A                                                                                                                                         | 2-3 plasma exchange sessions                                                                                         | N/A     | FFP                                                                                                                                      | None | <b>Mortality (no specified day) – 50%</b><br><br><b>Values 24 hrs before and 24 hrs after the last TPE:</b><br><br><b>D-dimers - 5.9 =&gt; 4.8 ng/mL</b><br><br><b>CRP - 292 =&gt; 84 mg/L</b>                                              |

Results presented in the “outcome” column are median. \* - results that were statistically significant. Absence of “\*” means that the result was either not significant or the significance was not calculated. MV - mechanical ventilation; IMV - invasive mechanical ventilation; NIPPV – non-invasive positive pressure ventilation; SOFA – Sequential Organ Failure Assessment; APACHE II - Acute Physiology and Chronic Health Evaluation II; TPE – therapeutic plasma exchange; CPT - convalescent plasma transfusion; CRP – C-reactive protein, LDH – lactate dehydrogenase, IL-6 – interleukin 6, PaO<sub>2</sub> – partial pressure of arterial oxygen, FiO<sub>2</sub> – fraction of inspired oxygen, N/A – not available.
